# Supplementary material for: Transporter gene family evolution in ectomycorrhizal fungi in relation to mineral weathering capabilities
Source: Copernicus journal article supplement (doi:10.5194/egusphere-2024-3930), 2025-01-17

[illegible]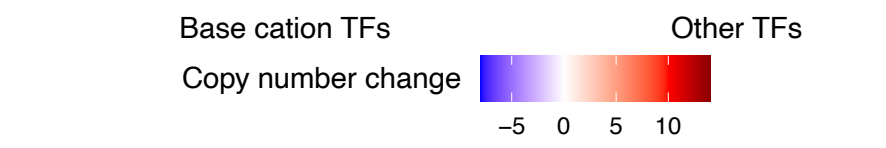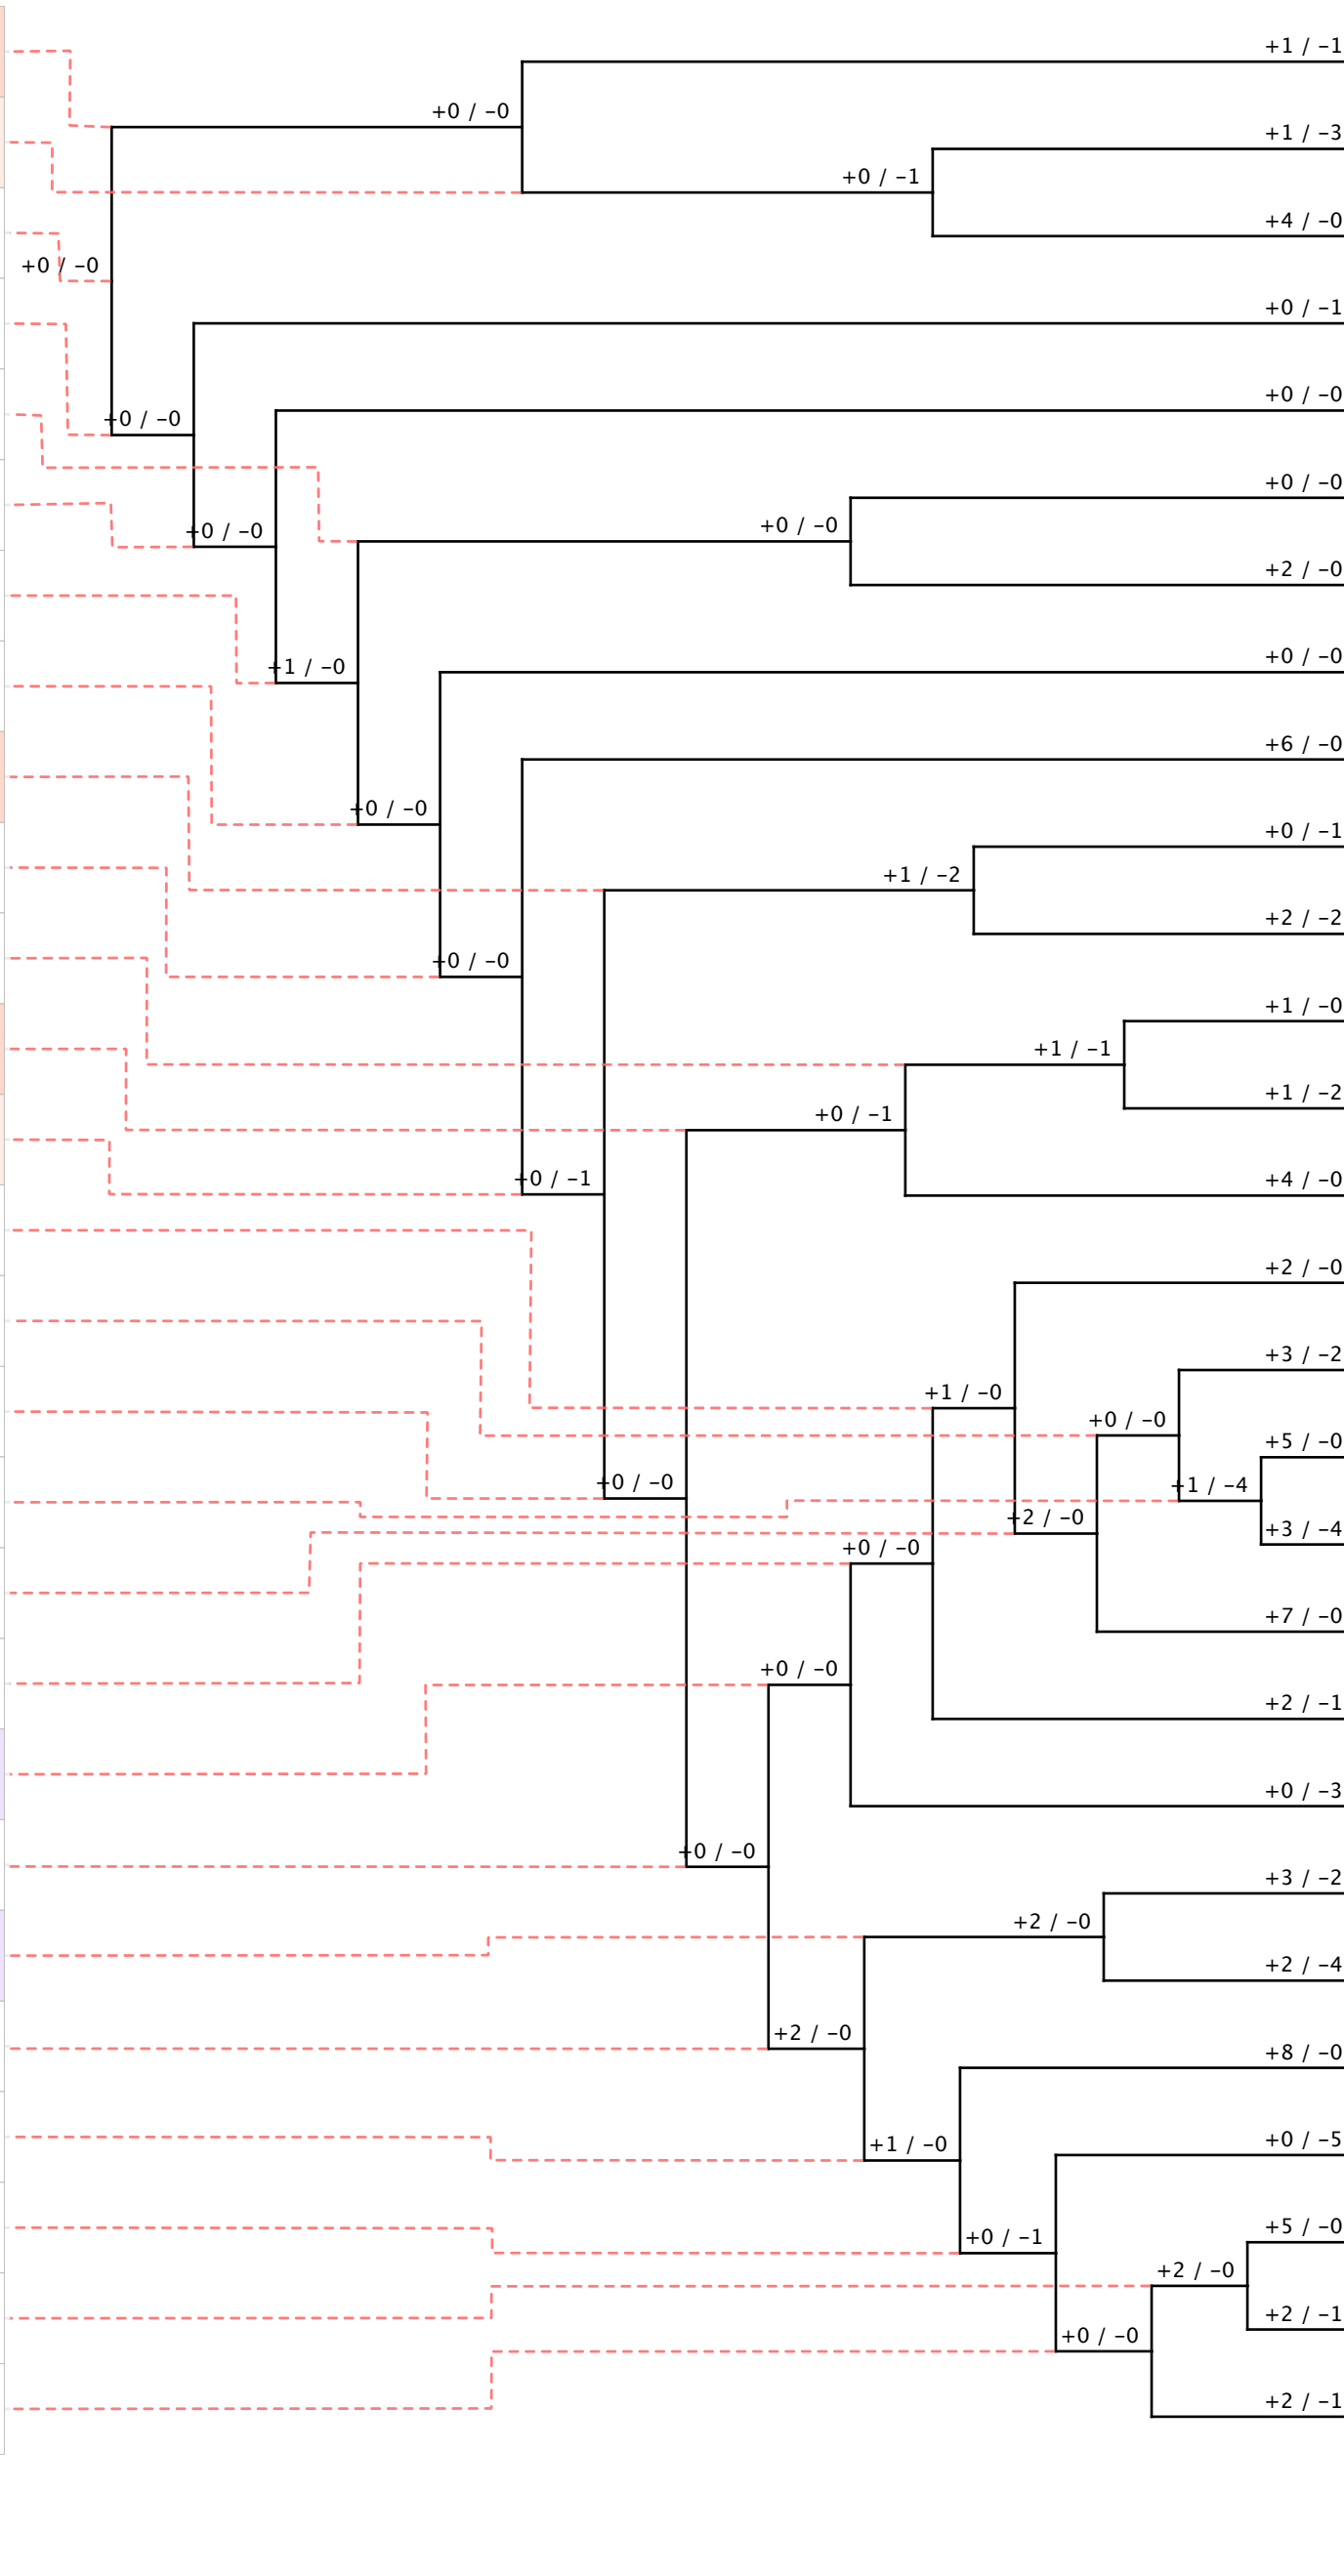

|                                     |         |         |         |          |           |           |           |           |         |          |         |          |         |          |         |
|-------------------------------------|---------|---------|---------|----------|-----------|-----------|-----------|-----------|---------|----------|---------|----------|---------|----------|---------|
| <i>Piloderma sphaerosporum</i>      | 2.A.1.2 | 2.A.1.3 | 2.A.1.7 | 2.A.1.14 | 3.A.1.201 | 3.A.1.205 | 3.A.1.208 | 3.A.1.210 | 3.A.3.2 | 3.A.3.10 | 2.A.1.1 | 2.A.1.13 | 2.A.3.4 | 2.A.3.10 | 3.A.3.8 |
|                                     |         |         |         | *        |           |           |           |           |         | *        |         |          |         |          |         |
| <i>Piloderma olivaceum</i>          |         |         |         | *        | *         | *         |           |           |         |          |         |          |         | *        |         |
| <i>Piloderma byssinum</i>           |         | *       |         |          | *         | *         |           |           |         |          |         |          |         | *        |         |
| <i>Serpula lacrymans</i>            | *       |         |         |          |           |           |           |           |         |          |         |          |         |          |         |
| <i>Coniophora puteana</i>           |         |         |         |          |           |           |           |           |         |          |         |          |         |          |         |
| <i>Suillus paluster</i>             |         |         |         |          |           |           |           |           |         |          |         |          |         |          |         |
| <i>Suillus ampliporus</i>           |         |         |         | *        |           |           | *         |           |         |          |         |          |         |          |         |
| <i>Suillus clintonianus</i>         |         |         |         |          |           |           |           |           |         |          |         |          |         |          |         |
| <i>Suillus lakei</i>                | *       |         |         | *        |           |           | *         | *         |         | *        |         | *        |         |          |         |
| <i>Suillus placidus</i>             |         |         |         | *        |           |           |           |           |         |          |         |          |         |          |         |
| <i>Suillus weaverae</i>             | *       |         |         |          | *         |           |           |           | *       |          | *       |          |         |          |         |
| <i>Suillus occidentalis</i>         |         |         |         |          |           |           | *         |           |         |          |         |          |         |          |         |
| <i>Suillus luteus</i>               |         | *       |         |          |           |           |           |           | *       |          |         |          |         |          | *       |
| <i>Suillus brevipes</i>             |         |         |         |          | *         | *         |           |           |         |          |         |          | *       | *        |         |
| <i>Suillus plorans</i>              |         |         |         |          |           |           | *         |           | *       |          |         |          |         |          |         |
| <i>Suillus variegatus</i>           | *       | *       | *       |          | *         |           |           |           | *       |          |         |          |         |          |         |
| <i>Suillus tomentosus</i>           |         | *       | *       |          |           |           | *         |           | *       |          |         | *        |         |          |         |
| <i>Suillus hirtellus</i>            | *       |         |         |          | *         | *         |           | *         |         |          | *       | *        |         |          | *       |
| <i>Suillus fuscotomentosus</i>      | *       |         |         |          | *         |           | *         | *         |         |          |         | *        |         | *        | *       |
| <i>Suillus discolor</i>             |         |         |         | *        | *         | *         |           |           |         |          |         |          |         |          |         |
| <i>Suillus bovinus</i>              | *       |         |         |          | *         | *         |           |           |         |          |         |          |         |          |         |
| <i>Suillus spraguei</i>             |         | *       |         | *        |           | *         |           |           |         |          |         |          | *       |          | *       |
| <i>Suillus decipiens</i>            |         | *       |         | *        | *         |           | *         |           | *       |          |         |          | *       |          |         |
| <i>Suillus cothurnatus</i>          | *       |         |         | *        | *         | *         |           | *         |         |          | *       | *        |         | *        |         |
| <i>Suillus subaureus</i>            | *       | *       | *       | *        |           |           |           |           |         |          |         |          | *       |          |         |
| <i>Suillus</i> cf. <i>subluteus</i> | *       |         |         | *        |           |           | *         | *         |         |          |         | *        |         |          |         |
| <i>Suillus subalutaceus</i>         |         |         | *       |          |           | *         |           |           |         |          |         |          |         |          | *       |
| <i>Suillus americanus</i>           |         | *       |         |          | *         | *         |           |           |         |          |         |          |         |          |         |

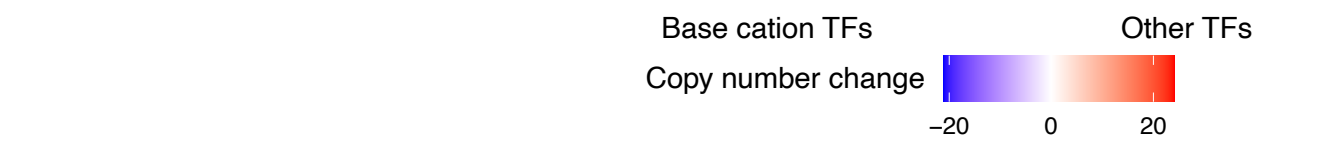

Supplement: Supplementary file [file Supplementary_Figure_4.pdf › Fixed figures and tables/Supplementary_Figure_4.pdf]
