# Supplementary material for: Transporter gene family evolution in ectomycorrhizal fungi in relation to mineral weathering capabilities
Source: Copernicus journal article supplement (doi:10.5194/egusphere-2024-3930), 2025-01-17

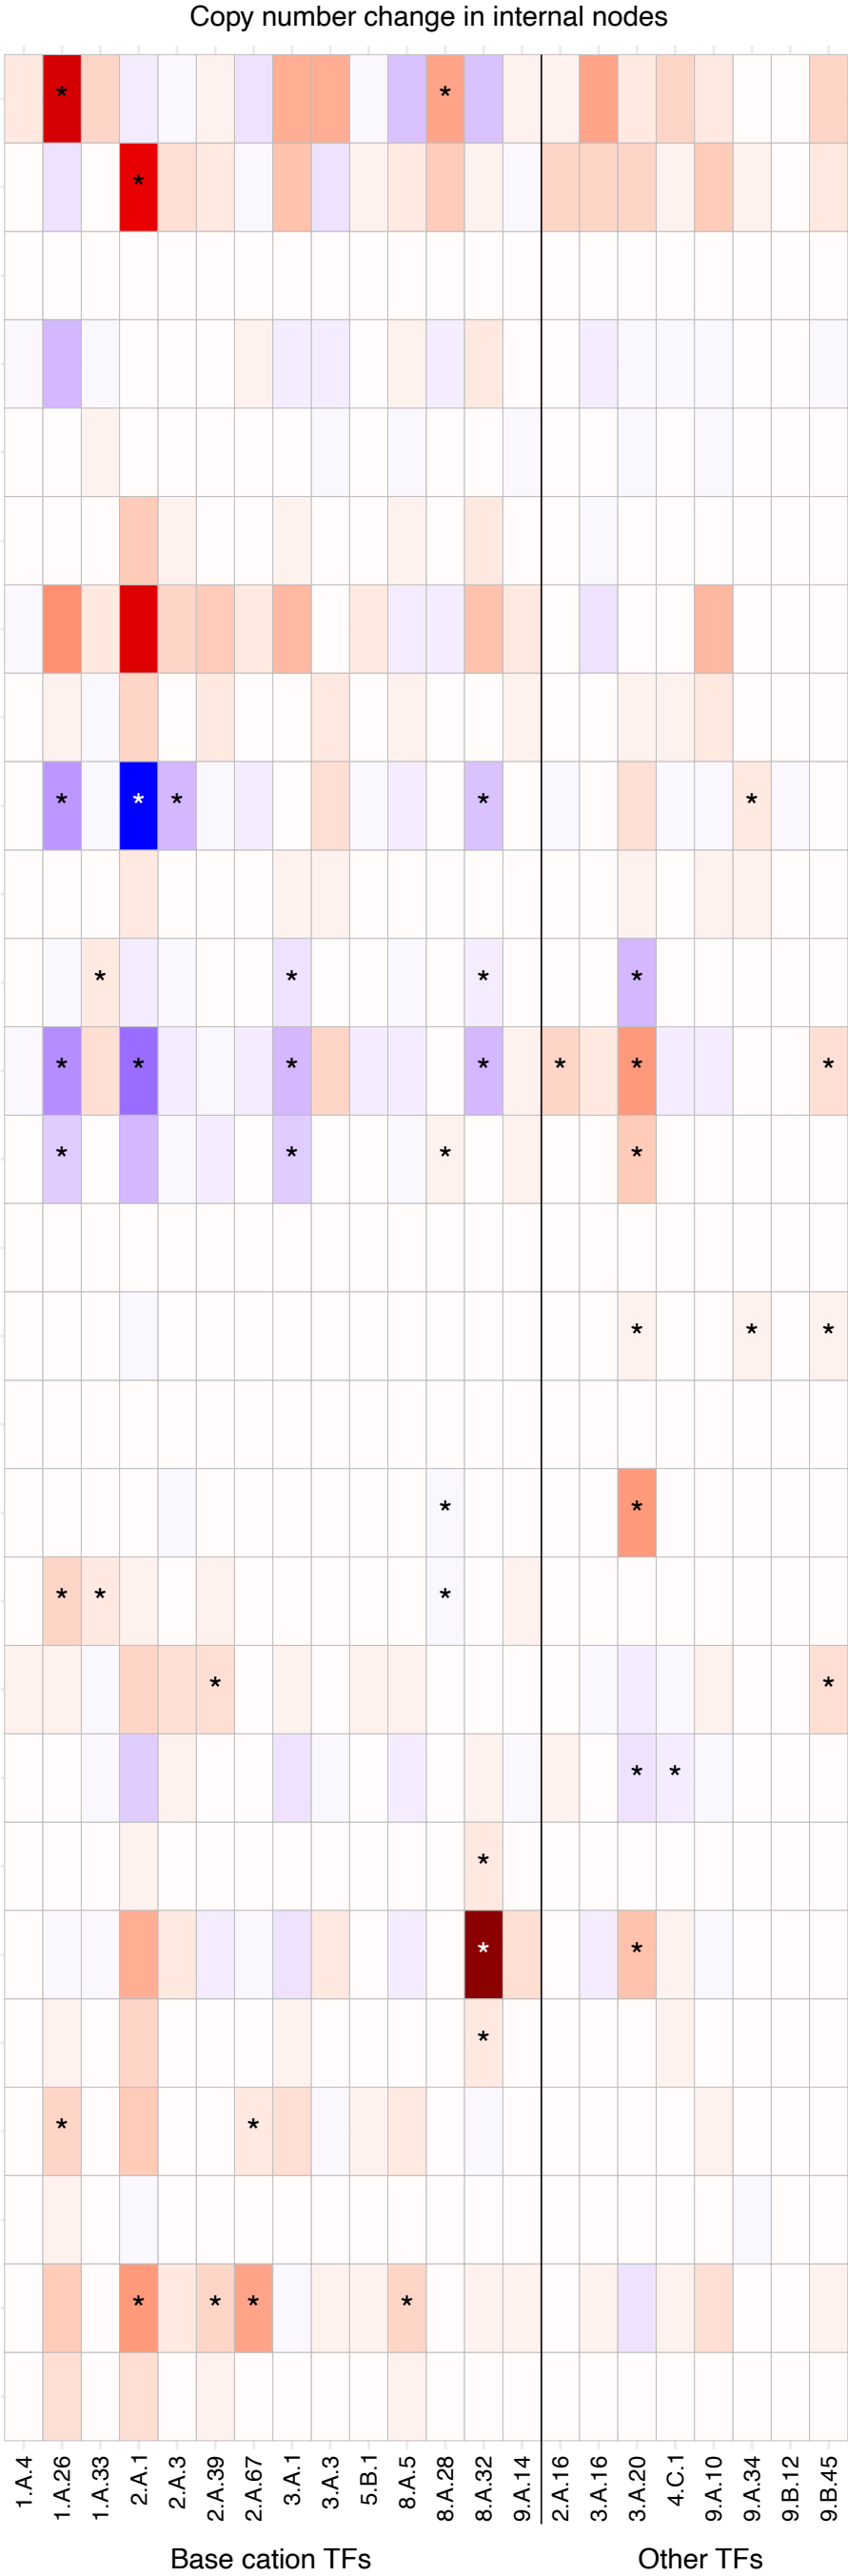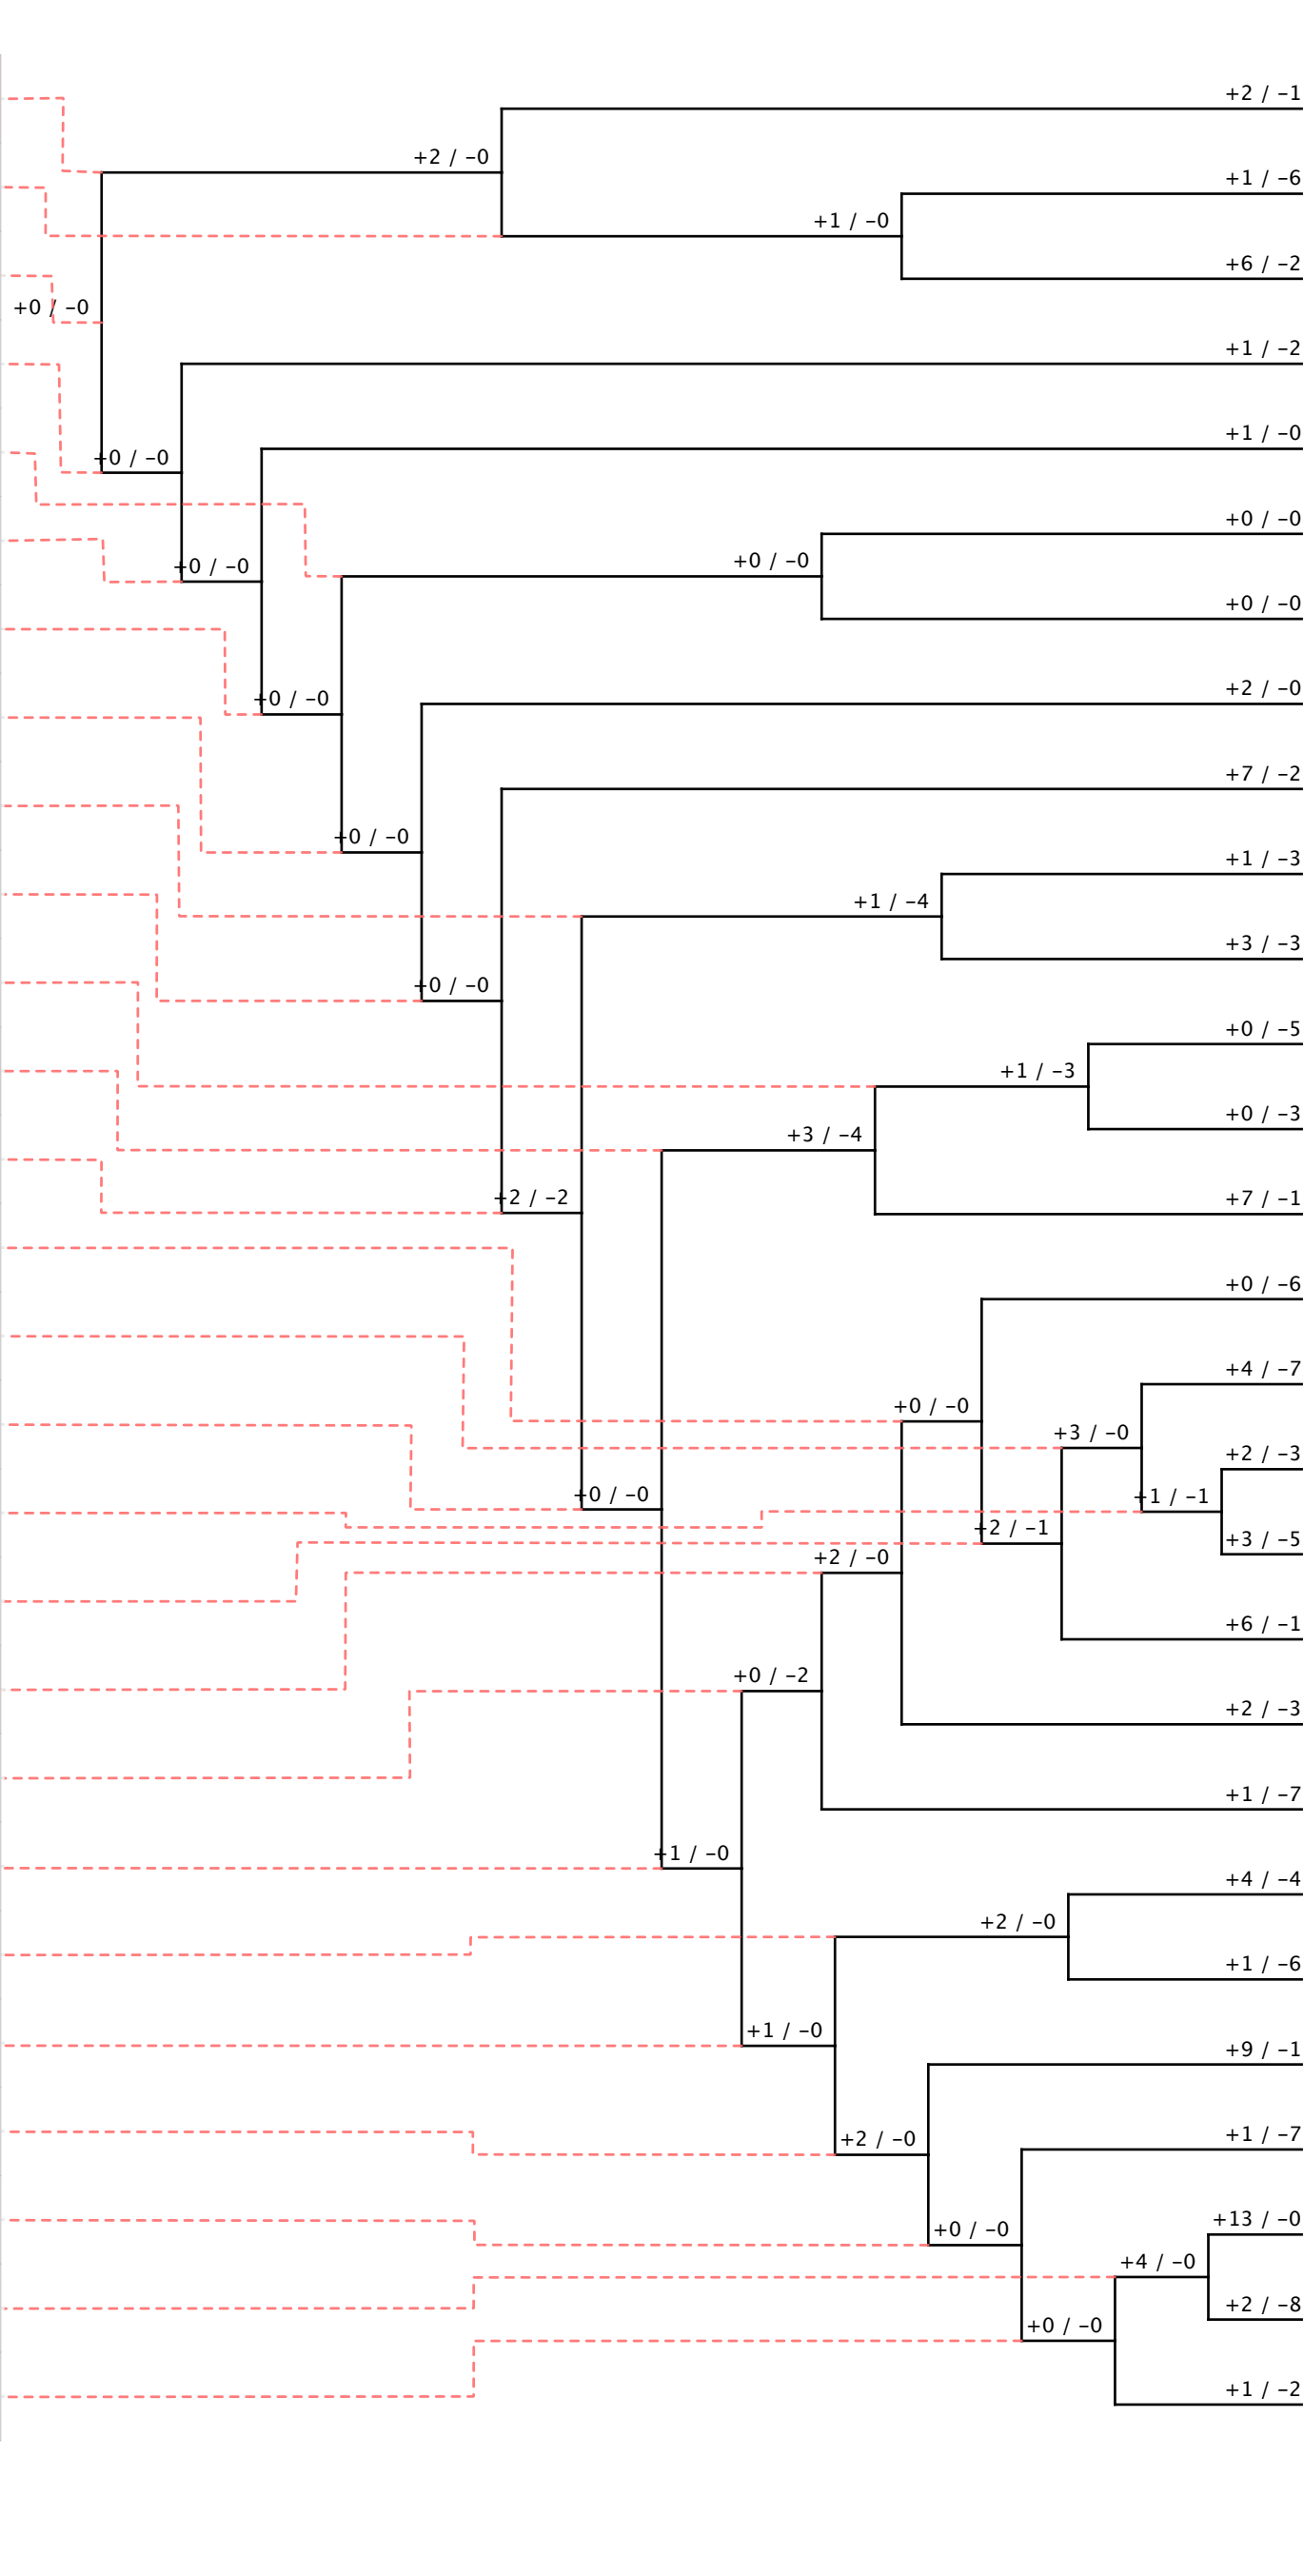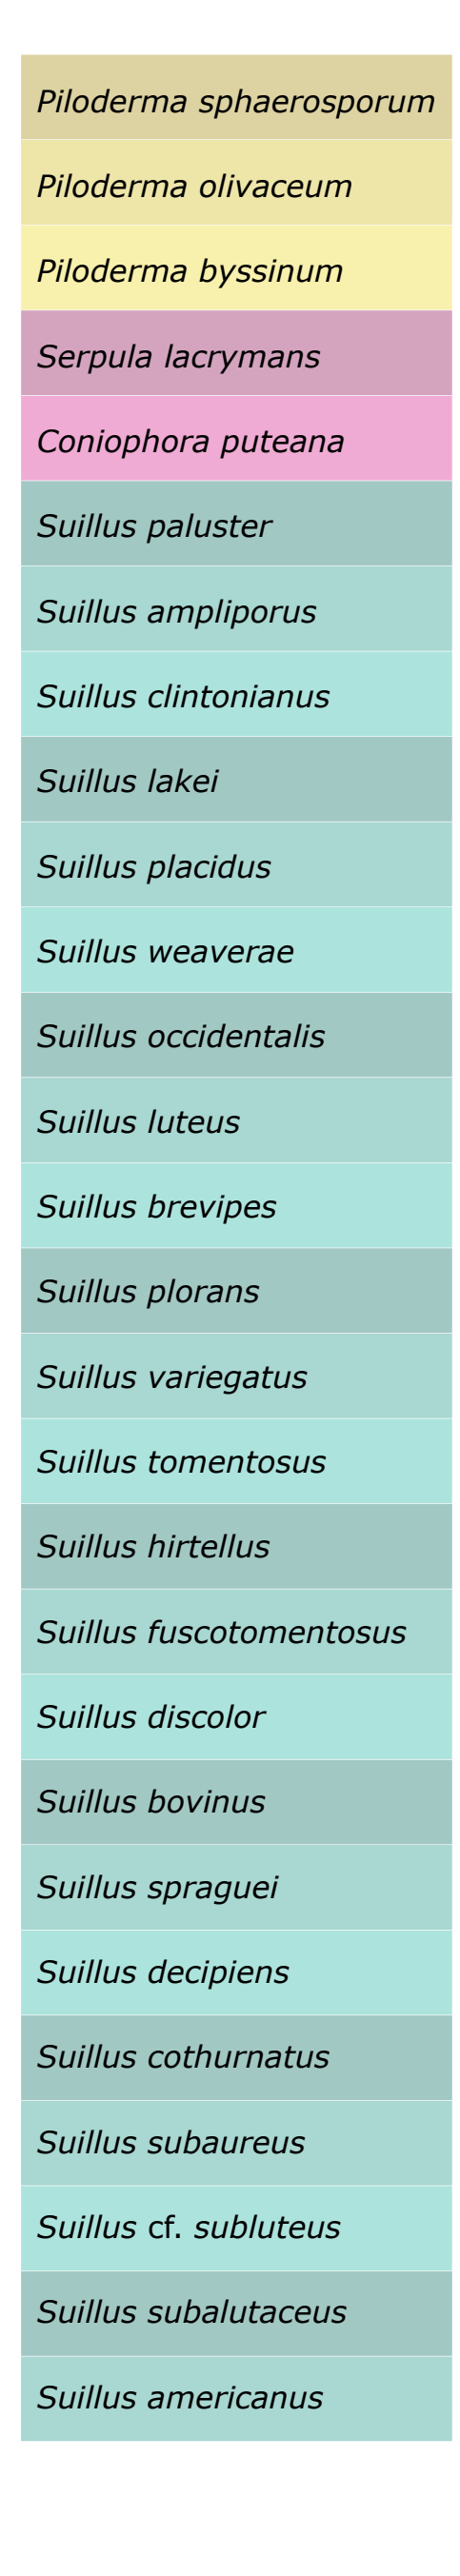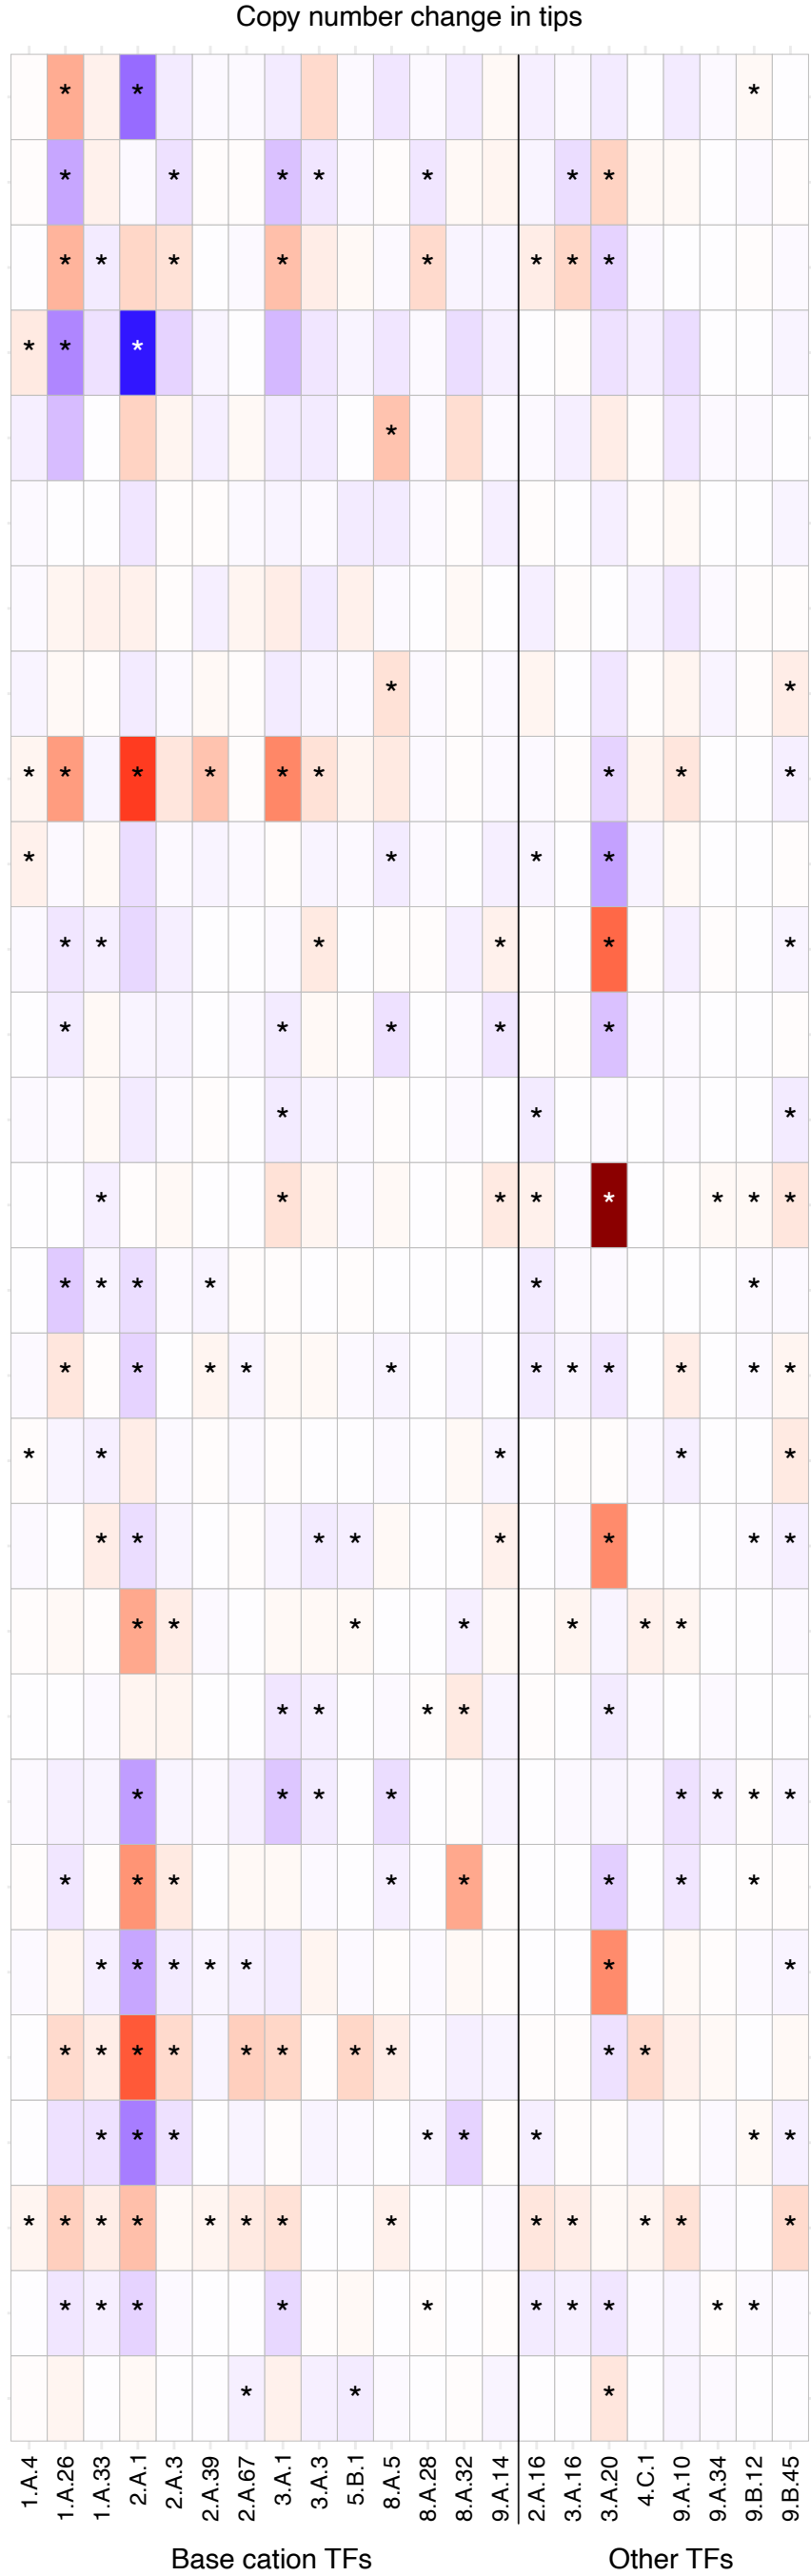

Supplement: Supplementary file [file Figure_3.pdf › Fixed figures and tables/Figure_3.pdf]
